# Supplementary material for: The Evaluation of APTT Reagents in Reference Plasma, Recombinant FVIII Products; Kovaltry® and Jivi® Using CWA, Including sTF/7FIX Assay
Source: PubMed Central journal article supplement — Clin Appl Thromb Hemost. 2021 Feb 19;27:1076029620976913. doi: 10.1177/1076029620976913 (PMC7900842; doi:10.1177/1076029620976913), 2021-02-19
Supplement: sj-pdf-1-cat-10.1177_1076029620976913.pdf [file sj-pdf-1-cat-10.1177_1076029620976913.pdf]

**Supplemental Table 1A.** Peak time of fibrin formation time with various APTT reagents

| FVIII | 1.00 IU (sec)    | 0.50 IU (sec)    | 0.10 IU (sec)    | 0.05 IU (sec)    | 0.01 IU (sec)    | 0.005 IU (sec)   | 0.001 IU (sec)   |
|-------|------------------|------------------|------------------|------------------|------------------|------------------|------------------|
| A     | 36.2 (35.9-36.6) | 43.3 (41.1-43.4) | 68.4 (68.4-68.6) | 80.7 (80.4-83.1) | 110 (110-110)    | 112 (112-132)    | Error            |
| B     | 32.6 (32.4-32.8) | 40.3 (40.0-40.4) | 57.6 (57.5-58.1) | 65.8 (65.5-66.9) | 85.4 (85.1-86.7) | 102 (101-102)    | 111 (110-111)    |
| C     | 31.6 (31.5-31.9) | 38.6 (38.5-38.8) | 60.6 (60.0-61.0) | 70.6 (70.6-72.5) | 96.0 (95.6-96.6) | 102 (101-102)    | 104 (104-104)    |
| D     | 29.7 (29.6-30.0) | 34.6 (34.5-34.6) | 50.4 (50.3-51.0) | 58.3 (58.0-59.6) | 81.9 (81.4-82.9) | 89.9 (89.9-90.2) | 97.2 (96.9-97.7) |
| E     | 33.9 (33.0-34.0) | 46.6 (46.6-47.0) | 76.6 (76.5-77.1) | 91.2 (90.7-92.1) | 134 (134-135)    | Error            | Error            |
| F     | 31.0 (30.4-31.2) | 37.7 (37.5-38.2) | 56.4 (56.0-57.3) | 65.6 (65.0-67.1) | 89.4 (88.5-89.8) | 97.0 (96.5-97.1) | Error            |
| G     | 26.9 (26.8-27.1) | 33.9 (33.8-34.0) | 51.3 (51.2-51.4) | 60.6 (60.5-61.4) | 83.2 (82.8-83.9) | 91.6 (91.3-92.2) | 98.8 (98.7-98.9) |
| H     | 28.9 (28.9-29.3) | 36.9 (36.9-37.0) | 58.1 (57.8-58.4) | 68.2 (68.1-69.1) | 89.5 (89.3-90.0) | 94.2 (94.0-94.5) | 97.1 (97.0-97.5) |
| I     | 28.8 (28.7-29.2) | 37.3 (37.2-37.5) | 61.3 (61.2-61.4) | 72.3 (72.2-72.9) | 97.7 (97.5-97.9) | 102 (102-102)    | 133 (125-134)    |
| J     | 29.4 (29.2-30.0) | 36.0 (35.9-36.4) | 56.0 (55.6-56.2) | 65.0 (64.9-65.2) | 88.1 (87.6-88.5) | 94.4 (93.9-94.4) | 99.2 (98.9-99.4) |
| K     | 28.4 (28.2-29.0) | 36.0 (36.0-36.2) | 61.2 (61.1-61.6) | 73.0 (72.7-73.1) | 98.0 (97.3-98.2) | 103 (103-103)    | 105 (105-105)    |
| L     | 36.6 (36.4-36.6) | 45.6 (45.3-45.6) | 68.7 (68.7-71.5) | 80.8 (80.3-82.3) | 105 (105-107)    | 108 (108-130)    | 111 (111-112)    |

**Supplemental Table 1B.** The 1stDPT with various APTT reagents

| FVIII | 1.00 IU (sec)    | 0.50 IU (sec)    | 0.10 IU (sec)    | 0.05 IU (sec)    | 0.01 IU (sec)    | 0.005 IU (sec)   | 0.001 IU (sec) |
|-------|------------------|------------------|------------------|------------------|------------------|------------------|----------------|
| A     | 35.0 (34.7-35.3) | 42.3 (40.3-42.4) | 67.6 (67.6-67.9) | 79.9 (79.5-82.3) | 115 (115-117)    | 120 (120-128)    | Error          |
| B     | 31.8 (31.7-31.9) | 39.4 (39.2-39.4) | 55.5 (55.4-55.8) | 62.6 (62.4-63.6) | 84.9 (84.4-85.8) | 93.7 (93.5-94.0) | 112 (111-112)  |
| C     | 30.6 (30.5-30.9) | 37.8 (37.7-38.0) | 60.2 (59.7-60.8) | 70.3 (70.2-72.1) | 96.4 (95.7-97.2) | 105 (105-106)    | 120 (119-120)  |
| D     | 28.6 (28.5-28.9) | 33.7 (33.5-33.7) | 49.3 (49.2-49.8) | 56.8 (56.6-58.1) | 80.3 (79.0-81.3) | 89.3 (88.9-90.0) | 111 (110-112)  |
| E     | 32.9 (32.1-33.0) | 45.2 (45.2-45.5) | 73.4 (73.1-73.9) | 91.0 (90.4-92.0) | 134 (134-135)    | Error            | Error          |
| F     | 30.4 (29.7-30.5) | 36.7 (36.6-37.2) | 53.9 (53.6-54.7) | 61.4 (61.1-62.9) | 79.5 (78.8-83.4) | 86.7 (86.0-89.8) | Error          |
| G     | 26.3 (26.2-26.5) | 33.3 (33.2-33.4) | 50.4 (50.2-50.4) | 59.3 (59.1-60.0) | 81.0 (80.5-81.6) | 91.3 (90.9-93.9) | 113 (112-114)  |
| H     | 28.2 (28.2-28.7) | 36.2 (36.2-36.2) | 56.8 (56.5-57.1) | 66.4 (66.3-67.3) | 87.8 (87.3-88.3) | 95.2 (94.7-95.6) | 109 (108-110)  |
| I     | 28.6 (28.5-29.0) | 37.1 (37.0-37.3) | 60.8 (60.7-60.8) | 71.5 (71.4-72.0) | 99.0 (98.7-99.2) | 110 (109-110)    | 120 (119-121)  |
| J     | 28.9 (28.7-29.4) | 35.5 (35.2-35.7) | 54.5 (54.0-54.7) | 63.0 (62.8-63.3) | 86.1 (85.3-86.3) | 94.7 (94.6-95.3) | 114 (113-116)  |
| K     | 28.0 (27.8-28.6) | 35.7 (35.6-35.8) | 60.5 (60.5-61.0) | 72.1 (72.0-72.3) | 98.2 (97.3-98.3) | 108 (108-109)    | 120 (120-120)  |
| L     | 35.3 (35.2-35.3) | 44.7 (44.3-45.8) | 68.3 (68.2-71.0) | 80.3 (79.9-81.9) | 114 (111-117)    | 120 (119-127)    | 120 (119-129)  |

**Supplemental Table 1C.** The 1<sup>st</sup> DPH with various APTT reagents

| FVIII | 1.00 IU (mAbs) | 0.50 IU (mAbs) | 0.10 IU (mAbs) | 0.05 IU (mAbs)  | 0.01 IU (mAbs)   | 0.005 IU (mAbs)  | 0.001 IU (mAbs)  |
|-------|----------------|----------------|----------------|-----------------|------------------|------------------|------------------|
| A     | 281 (278-286)  | 264 (252-265)  | 197 (195-198)  | 168 (163-168)   | 105 (101-107)    | 75.5 (73.5-88.2) | 60.8 (50.0-61.8) |
| B     | 229 (226-230)  | 207 (207-209)  | 156 (154-157)  | 134 (130-135)   | 93.8 (90.1-94.7) | 67.6 (66.9-67.8) | 44.7 (43.8-45.1) |
| C     | 281 (278-282)  | 249 (247-250)  | 178 (177-180)  | 153 (150-155)   | 99.5 (96.5-100)  | 84.1 (83.6-84.9) | 61.2 (60.8-61.3) |
| D     | 234 (230-235)  | 216 (216-217)  | 160 (158-160)  | 136 (132-137)   | 86.4 (82.4-87.1) | 70.4 (70.2-71.2) | 48.5 (48.1-49.1) |
| E     | 234 (227-236)  | 197 (197-199)  | 130 (128-130)  | 108 (105-109)   | 71.7 (68.8-72.4) | Error            | Error            |
| F     | 176 (168-192)  | 156 (151-177)  | 115 (106-127)  | 93.0 (87.7-1-6) | 53.7 (51.6-67.0) | 43.6 (41.3-52.2) | Error            |
| G     | 338 (329-340)  | 286 (284-286)  | 192 (191-193)  | 159 (157-160)   | 102 (99.4-102)   | 84.5 (83.8-85.6) | 58.8 (58.7-59.7) |
| H     | 285 (272-288)  | 243 (242-244)  | 164 (163-166)  | 136 (134-137)   | 88.3 (84.6-89.2) | 74.1 (73.5-74.5) | 54.5 (53.7-54.9) |
| I     | 301 (291-312)  | 264 (264-265)  | 176 (174-176)  | 145 (143-145)   | 90.4 (89.0-91.3) | 75.3 (74.1-76.3) | 51.2 (50.2-53.2) |
| J     | 293 (278-298)  | 250 (247-253)  | 167 (166-168)  | 139 (138-140)   | 91.8 (91.5-95.2) | 78.0 (76.6-78.3) | 56.4 (56.1-57.5) |
| K     | 333 (323-341)  | 300 (299-301)  | 199 (198-200)  | 164 (163-165)   | 106 (105-117)    | 88.8 (88.4-89.3) | 65.8 (65.3-66.5) |
| L     | 244 (241-247)  | 204 (203-206)  | 142 (141-144)  | 124 (122-126)   | 81.5 (81.1-83.2) | 69.1 (66.0-71.4) | 30.1 (28.7-35.5) |

[APTT reagents] A, APTT-SP; B, APTT-SS; C, STA Cephascreen; D, Coagpia APTT-N; E, APTT PSL; F, C.K. Prest; G, APTT-SLA; H, TC APTT; I, APTT FS; J, APTT FSL; K, PTT ACT; L, STA PTT A

[Abbreviations] HemosIL APTT-SP; APTT-SP and HemosIL SynthASil; APTT-SS (Instrumentation Laboratory), STA Cephascreen; STA Cephascreen, D, STA PTT Automate; STA PTT A and C.K. Prest (Diagnostica Stago S.A.S), Coagpia APTT-N; APTT-N (SEKISUI MEDICAL CO., LTD.), Thrombocheck APTT-SLA; APTT-SLA and Thrombocheck APTT; TC APTT (Sysmex Corporation) and Dade<sup>®</sup> Actin<sup>®</sup> FS Activated PTT Reagent; APTT FS, Dade<sup>®</sup> Actin<sup>®</sup> FSL Activated PTT Reagent; APTT FSL, Dade<sup>®</sup> Actin<sup>®</sup> FSL Activated Cephaloplastin Reagent; APTT ACT and Pathromtin<sup>®</sup> SL; APTT PSL (Siemens Healthcare Diagnostics Products GmbH).

1stDPT, first derivative peak time; 1stDPH, first derivative peak height; FVIII, coagulation factor FVIII

**Supplemental Table 2A.** The 1<sup>st</sup> DPT of Kovaltry<sup>®</sup> and Jivi<sup>®</sup>, measured with various APTT reagents

| FVIII | FVIII                 | 1.00 IU (sec) | 0.50 IU (sec) | 0.10 IU (sec) | 0.05 IU (sec) | 0.01 IU (sec) | 0.005 IU (sec) | 0.001 IU (sec) |
|-------|-----------------------|---------------|---------------|---------------|---------------|---------------|----------------|----------------|
| A     | Kovaltry <sup>®</sup> | 36.3±0.6      | 44.7±0.3      | 70.5±1.2      | 81.7±1.2      | 117.0±0.5     | 120.6±1.4      | 161.6±1.9      |
|       | Jivi <sup>®</sup>     | 68.6±2.2      | 84.8±4.6      | 116.4±3.4     | 140.3±1.2     | 176.5±2.3     | 172.3±6.1      | 171.7±6.3      |
| B     | Kovaltry <sup>®</sup> | 30.9±0.4      | 38.0±0.4      | 53.1±0.2      | 61.0±0.4      | 82.8±1.1      | 91.9±0.7       | 111.4±1.6      |
|       | Jivi <sup>®</sup>     | 28.9±0.3      | 36.2±0.9      | 52.5±0.8      | 60.7±0.3      | 60.7±0.3      | 90.6±0.5       | 109.4±0.6      |
| C     | Kovaltry <sup>®</sup> | 33.5±1.0      | 38.5±0.3      | 61.4±1.0      | 71.1±0.6      | 94.4±1.5      | 104.5±1.0      | 119.6±0.1      |
|       | Jivi <sup>®</sup>     | 30.4±0.4      | 37.0±0.6      | 59.1±0.7      | 70.5±0.4      | 94.7±0.8      | 102.1±4.0      | 119.4±0.2      |
| D     | Kovaltry <sup>®</sup> | 28.5±0.4      | 33.4±0.4      | 48.6±0.7      | 56.7±0.2      | 80.6±0.4      | 90.0±0.7       | 118.2±1.7      |
|       | Jivi <sup>®</sup>     | 27.2±0.1      | 32.6±1.1      | 48.0±0.8      | 57.0±0.8      | 78.3±0.8      | 90.6±1.4       | 117.8±5.3      |
| E     | Kovaltry <sup>®</sup> | 40.1±1.2      | 48.6±0.2      | 75.9±1.4      | 95.7±0.8      | 134.5±1.8     | Error          | Error          |
|       | Jivi <sup>®</sup>     | 42.4±0.7      | 54.5±1.9      | 81.4±1.1      | 101.8±0.3     | 151.3±0.9     | Error          | Error          |
| F     | Kovaltry <sup>®</sup> | 31.6±1.1      | 37.9±0.9      | 54.2±1.5      | 61.9±0.1      | 79.7±0.4      | 87.3±0.9       | 95.8±3.4       |
|       | Jivi <sup>®</sup>     | 36.2±0.8      | 44.0±0.5      | 55.0±1.3      | 62.4±0.8      | 81.9±1.3      | 88.3±1.0       | 97.1±2.0       |
| G     | Kovaltry <sup>®</sup> | 26.5±0.4      | 33.7±0.4      | 50.2±0.6      | 59.7±0.6      | 81.8±0.4      | 92.3±0.9       | 114.6±0.6      |
|       | Jivi <sup>®</sup>     | 25.0±0.4      | 32.3±0.5      | 48.3±0.5      | 55.1±0.4      | 78.1±0.6      | 88.4±1.7       | 108.4±2.5      |
| H     | Kovaltry <sup>®</sup> | 30.4±0.4      | 38.2±1.4      | 57.6±0.4      | 68.3±0.6      | 88.4±0.1      | 97.7±1.0       | 111.1±3.2      |
|       | Jivi <sup>®</sup>     | 28.1±0.6      | 35.6±0.7      | 57.7±0.7      | 65.9±0.7      | 86.4±0.6      | 97.3±0.4       | 106.5±3.6      |
| I     | Kovaltry <sup>®</sup> | 32.1±0.4      | 40.2±0.7      | 62.6±0.7      | 73.5±0.9      | 99.8±1.3      | 111.5±2.7      | 122.6±2.6      |
|       | Jivi <sup>®</sup>     | 27.6±1.2      | 35.2±0.5      | 55.7±0.7      | 67.4±0.8      | 91.5±1.9      | 107.4±3.4      | 120.9±2.2      |
| J     | Kovaltry <sup>®</sup> | 28.2±0.3      | 34.1±0.8      | 53.8±1.2      | 62.9±1.0      | 86.1±1.5      | 94.4±0.8       | 115.1±0.4      |
|       | Jivi <sup>®</sup>     | 27.0±0.2      | 31.6±0.6      | 51.6±0.8      | 60.6±0.5      | 83.0±1.6      | 92.5±1.3       | 112.3±3.1      |
| K     | Kovaltry <sup>®</sup> | 34.1±0.4      | 42.9±0.5      | 62.6±0.2      | 74.0±0.4      | 99.8±1.3      | 111.5±2.7      | 119.6±0.1      |
|       | Jivi <sup>®</sup>     | 27.9±0.2      | 35.4±1.3      | 59.7±0.4      | 70.1±0.5      | 96.8±1.4      | 107.4±3.4      | 114.2±5.0      |
| L     | Kovaltry <sup>®</sup> | 35.6±0.6      | 44.4±1.1      | 68.0±0.8      | 80.9±0.3      | 110.2±2.3     | 120.3±1.2      | 150.7±1.1      |
|       | Jivi <sup>®</sup>     | 74.9±1.7      | 90.6±0.7      | 115.4±3.9     | 129.4±1.0     | 136.9±0.5     | 146.0±1.7      | 148.0±1.0      |

**Supplemental Table 2B.** The 1stDPH of Kovaltry® and Jivi®, measured with various APTT reagents

| FVIII | FVIII     | 1.00 IU (mAbs) | 0.50 IU (mAbs) | 0.10 IU (mAbs) | 0.05 IU (mAbs) | 0.01 IU (mAbs) | 0.005 IU (mAbs) | 0.001 IU (mAbs) |
|-------|-----------|----------------|----------------|----------------|----------------|----------------|-----------------|-----------------|
| A     | Kovaltry® | 290.4±6.1      | 264.7±4.1      | 199.2±2.2      | 170.3±3.7      | 107.7±1.8      | 75.8±39.6       | 55.9±4.4        |
|       | Jivi®     | 149.3±3.8      | 116.1±14.1     | 69.7±3.5       | 64.1±1.5       | 54.2±2.1       | 39.6±0.8        | 19.6±0.6        |
| B     | Kovaltry® | 230.1±1.9      | 208.7±4.8      | 160.9±7.1      | 138.7±3.2      | 99.3±5.2       | 69.3±5.3        | 57.5±2.8        |
|       | Jivi®     | 250.8±3.7      | 221.1±1.6      | 172.2±2.5      | 144.5±1.1      | 102.9±4.8      | 72.8±3.9        | 60.6±3.0        |
| C     | Kovaltry® | 285.4±3.8      | 252.9±4.0      | 183.3±1.9      | 157.5±5.3      | 101.2±6.1      | 88.4±0.1        | 63.0±0.9        |
|       | Jivi®     | 304.5±3.2      | 269.4±6.7      | 193.6±6.3      | 165.7±1.2      | 103.2±4.9      | 86.7±2.1        | 63.2±0.4        |
| D     | Kovaltry® | 251.2±6.2      | 226.2±8.2      | 165.9±1.3      | 140.9±2.2      | 90.2±2.0       | 75.5±0.5        | 48.2±0.4        |
|       | Jivi®     | 263.9±11.4     | 232.8±1.3      | 177.4±2.2      | 150.2±0.6      | 91.3±1.4       | 77.9±2.9        | 52.4±1.2        |
| E     | Kovaltry® | 231.3±5.0      | 199.3±3.4      | 137.1±5.9      | 109.5±0.6      | 75.5±0.7       | Error           | Error           |
|       | Jivi®     | 243.4±4.7      | 208.5±6.7      | 153.4±4.5      | 125.1±6.0      | 86.2±4.9       | Error           | Error           |
| F     | Kovaltry® | 176.0±2.5      | 160.2±8.4      | 121.0±8.2      | 98.5±3.8       | 56.7±1.2       | 48.8±0.8        | 36.9±2.6        |
|       | Jivi®     | 189.4±2.7      | 157.1±4.4      | 123.3±3.0      | 103.2±6.1      | 61.7±4.4       | 54.9±3.7        | 36.7±1.7        |
| G     | Kovaltry® | 346.4±4.6      | 301.0±4.2      | 203.6±5.0      | 163.6±2.7      | 106.7±0.2      | 86.0±5.2        | 61.2±1.1        |
|       | Jivi®     | 359.8±2.2      | 328.8±2.9      | 223.7±1.1      | 173.8±3.6      | 118.8±7.9      | 95.4±4.1        | 65.9±3.8        |
| H     | Kovaltry® | 285.1 ±2.3     | 245.1±1.7      | 166.3±1.4      | 140.8±6.9      | 89.3±2.7       | 75.3±1.2        | 53.2±1.7        |
|       | Jivi®     | 301.0±1.6      | 265.8±2.5      | 187.4±7.0      | 157.0±2.7      | 104.3±4.9      | 82.1±3.3        | 60.3±0.6        |
| I     | Kovaltry® | 303.0±3.5      | 266.0±4.6      | 184.2±0.8      | 146.2±1.0      | 98.8±0.8       | 79.4±1.0        | 58.5±0.9        |
|       | Jivi®     | 320.0±6.4      | 278.7±4.2      | 198.5±4.9      | 161.6±3.2      | 111.8±1.7      | 86.8±1.8        | 62.2±1.3        |
| J     | Kovaltry® | 301.5±5.4      | 267.9±5.7      | 173.2±0.3      | 142.8±2.8      | 94.6±1.9       | 79.3±0.9        | 57.6±0.8        |
|       | Jivi®     | 313.5±4.3      | 282.3±1.6      | 186.6±1.7      | 155.5±3.7      | 103.7±1.6      | 86.9±2.1        | 62.3±0.7        |
| K     | Kovaltry® | 341.9±2.3      | 307.9±3.5      | 207.3±2.1      | 173.6±3.6      | 111.8±3.4      | 95.0±0.7        | 73.8±5.9        |
|       | Jivi®     | 369.7±2.9      | 332.0±1.6      | 217.1±4.7      | 185.3±4.3      | 129.7±3.8      | 105.3±2.9       | 81.7±3.1        |
| L     | Kovaltry® | 249.3±3.2      | 208.7±3.7      | 158.1±3.6      | 125.6±1.1      | 86.3±2.9       | 67.5±7.9        | 38.1±4.5        |
|       | Jivi®     | 149.4±4.6      | 116.7±6.5      | 84.0±6.4       | 67.4±1.9       | 40.6±4.9       | 27.1±1.7        | 22.9±2.2        |

[APTT reagents] A, APTT-SP; B, APTT-SS; C, STA Cephascreen; D, Coagpia APTT-N; E, APTT PSL; F, C.K. Prest; G, APTT-SLA; H, TC APTT; I, APTT FS; J, APTT FSL; K, PTT ACT; L, STA PTT A

[Abbreviations] HemosIL APTT-SP; APTT-SP and HemosIL SynthASil; APTT-SS (Instrumentation Laboratory), STA Cephascreen; STA Cephascreen, D, STA PTT Automate; STA PTT A and C.K. Prest (Diagnostica Stago S.A.S), Coagpia APTT-N; APTT-N (SEKISUI MEDICAL CO., LTD.), Thrombocheck APTT-SLA; APTT-SLA and Thrombocheck APTT; TC APTT (Sysmex Corporation) and Dade® Actin® FS Activated PTT Reagent;

APTT FS, Dade<sup>®</sup> Actin<sup>®</sup> FSL Activated PTT Reagent; APTT FSL, Dade<sup>®</sup> Actin<sup>®</sup> FSL Activated Cephaloplastin Reagent; APTT ACT and Pathromtin<sup>®</sup> SL; APTT PSL (Siemens Healthcare Diagnostics Products GmbH).

1stDPT, first derivative peak time; 1stDPH, first derivative peak height; FVIII, coagulation factor FVIII

**Supplemental Table 3.** FVIII concentrations in normal plasma, Kovaltry® and Jivi®, and 1<sup>st</sup> DPT and 1<sup>st</sup> DPH in the sTF/FIX assay

|                               | FVIII         | 1.00 IU    | 0.50 IU   | 0.10 IU   | 0.05 IU   | 0.01 IU   | 0.005 IU  |
|-------------------------------|---------------|------------|-----------|-----------|-----------|-----------|-----------|
| 1 <sup>st</sup> DPT<br>(sec)  | Normal plasma | 105.1±3.7  | 113.5±2.0 | 120.8±0.5 | 125.7±0.9 | 131.4±1.1 | 140.8±2.5 |
|                               | Kovaltry®     | 107.1 ±1.6 | 114.7±2.6 | 119.8±1.3 | 124.7±0.6 | 131.0±1.0 | 137.0±1.0 |
|                               | Jivi®         | 106.9±1.5  | 113.7±1.5 | 118.7±0.6 | 122.0±1.0 | 129.3±0.6 | 136.7±1.2 |
| 1 <sup>st</sup> DPH<br>(mabs) | Normal plasma | 44.4±0.7   | 39.0±0.7  | 33.4±0.5  | 30.9±0.4  | 28.9±0.2  | 27.0±0.6  |
|                               | Kovaltry®     | 45.2±0.5   | 38.9±0.5  | 32.8±0.4  | 30.5±0.2  | 28.6±0.5  | 27.9±0.2  |
|                               | Jivi®         | 46.4±0.4   | 41.3±0.6  | 35.4±0.3  | 32.4±0.3  | 30.2±0.3  | 28.3±0.4  |

1<sup>st</sup> DP, first derivative peak; 1<sup>st</sup> DPT, 1<sup>st</sup> DP time; 1<sup>st</sup> DPH, 1<sup>st</sup> DP height; FVIII, coagulation factor FVIII.

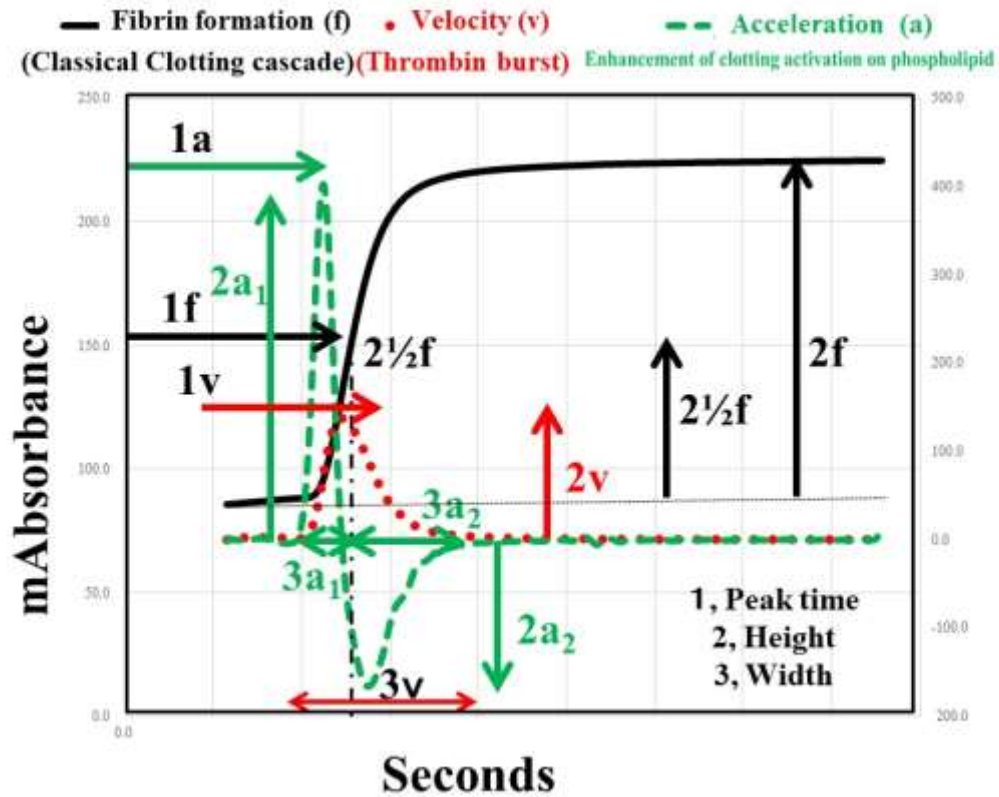

**Supplemental Figure 1. Parameters of the CWA (APTT)**

CWA, clot waveform analysis; APTT, activated partial thromboplastin time;

F, fibrin formation curve; v, velocity (1<sup>st</sup> derivative curve; DC); a, acceleration (2<sup>nd</sup> derivative curve, DC), 1, peak time; 2, peak height; 3, peak width.



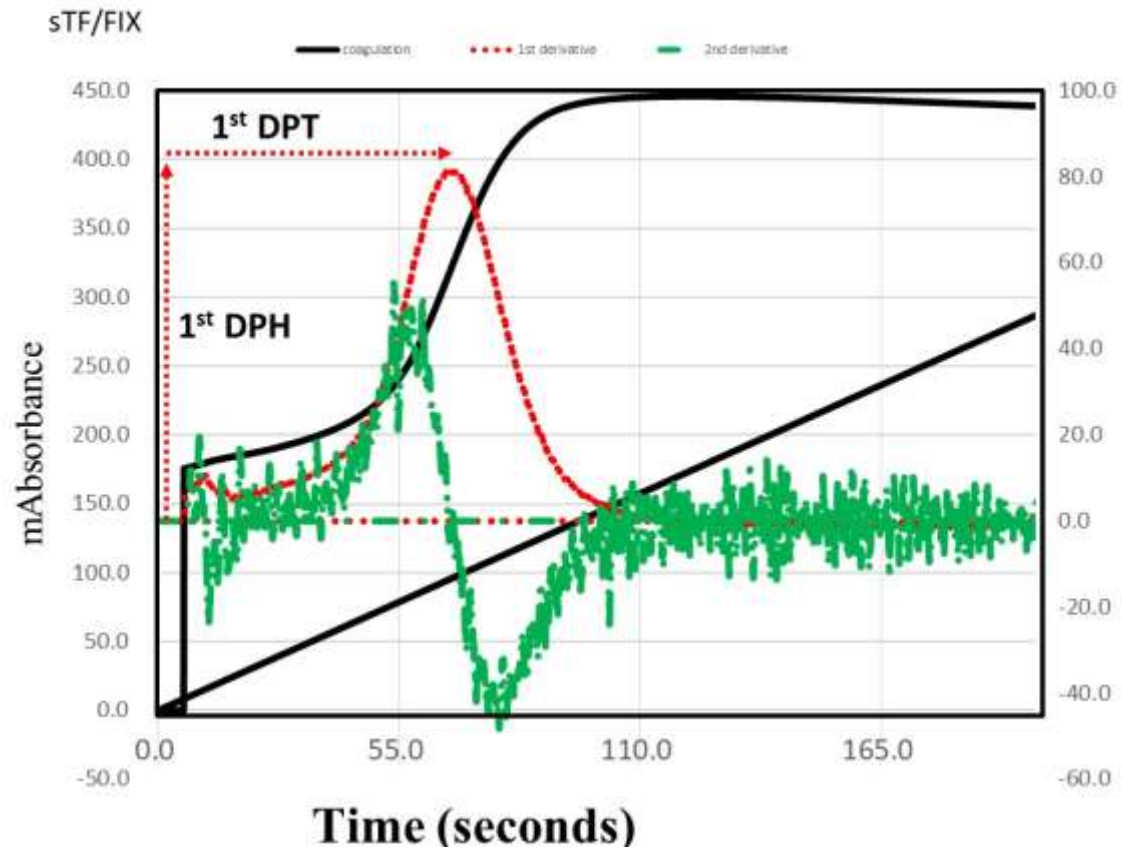

**Supplemental Figure 2.** Parameters of sTF/FIX

1<sup>st</sup> DPT, first derivative peak time; 1<sup>st</sup> DPH, first derivative peak height.

Supplementary Figure 3A

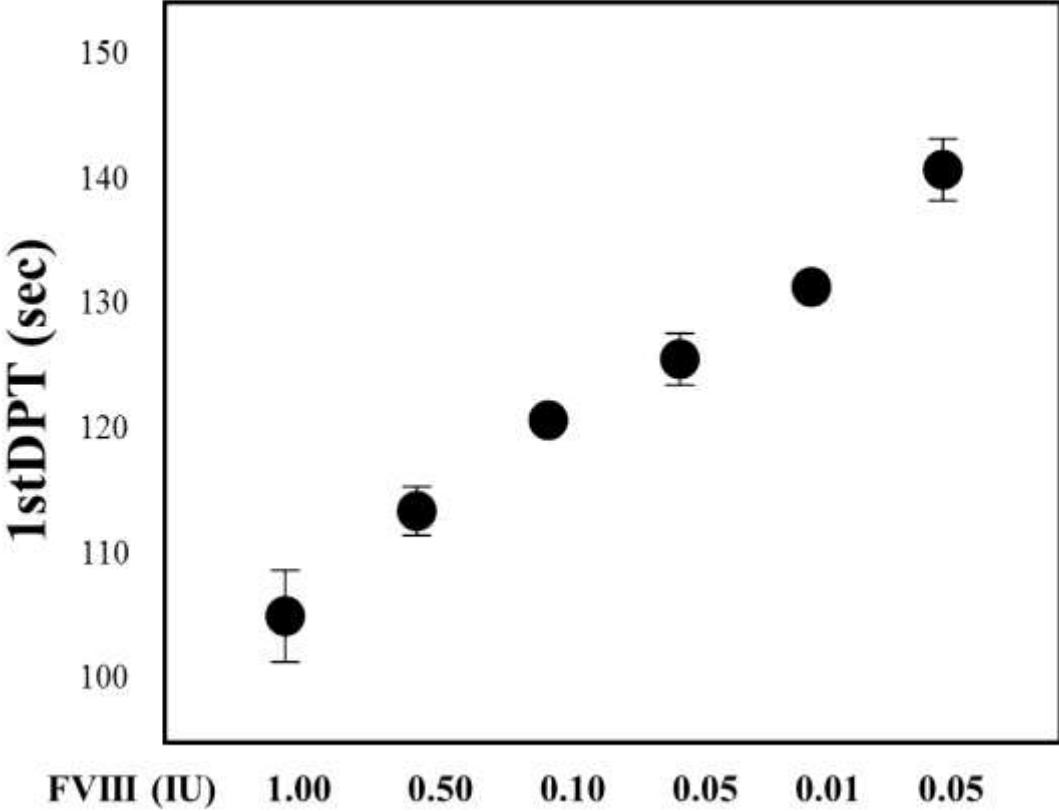

Supplementary Figure 3B

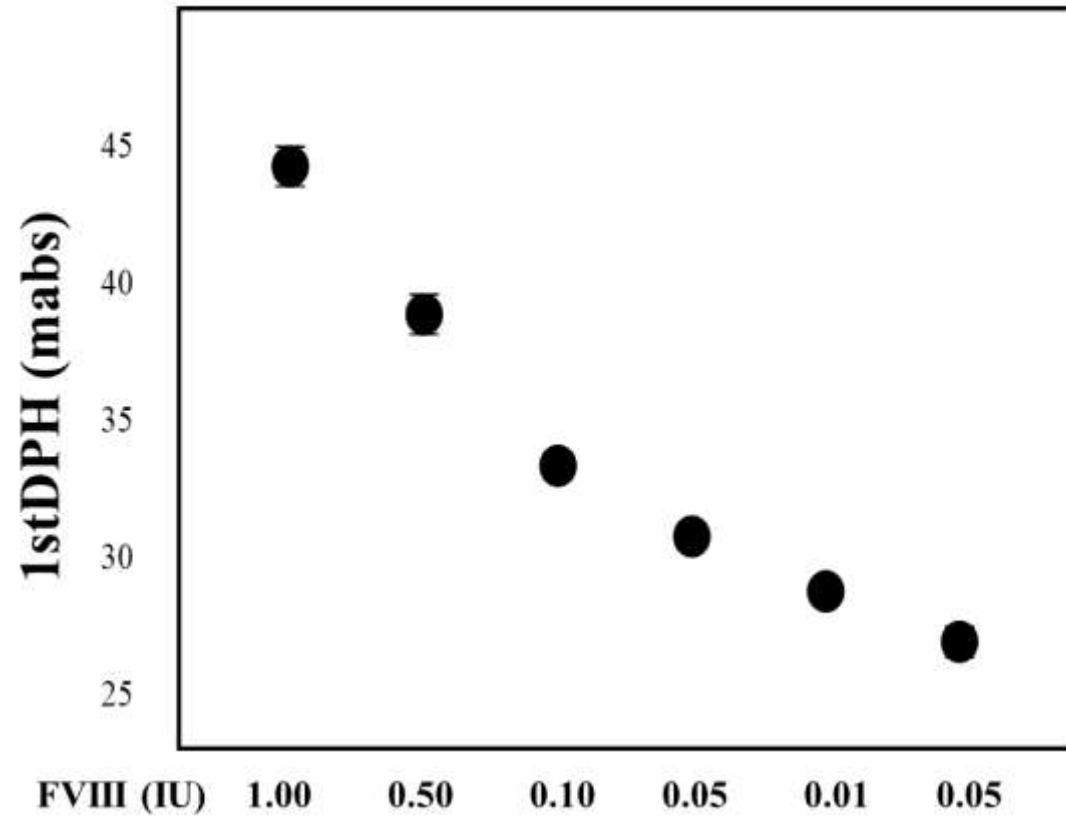

**Figure 3.** The 1<sup>st</sup> DPT (A) and 1<sup>st</sup> DPH (B) of the sTF/FIX assay in various concentrations of FVIII

1<sup>st</sup> DPT, first derivative peak time; 1<sup>st</sup> DPH, first derivative peak height
